# Supplementary material for: Knowledge and Attitudes about Antibiotics and Antibiotic Resistance of 2404 UK Healthcare Workers
Source: MDPI journal article supplement (doi:10.3390/antibiotics11081133), 2022-08-21

## Supplementary figures

**Supplementary Table S1 UK responses across the devolved administrations**

| Country          | Number of responses |       |
|------------------|---------------------|-------|
|                  | n                   | %     |
| England          | 1,210               | 50.73 |
| Northern Ireland | 51                  | 2.14  |
| Scotland         | 949                 | 39.79 |
| Wales            | 175                 | 7.34  |

**Supplementary Figure S1 – Participation in the survey by region in England**

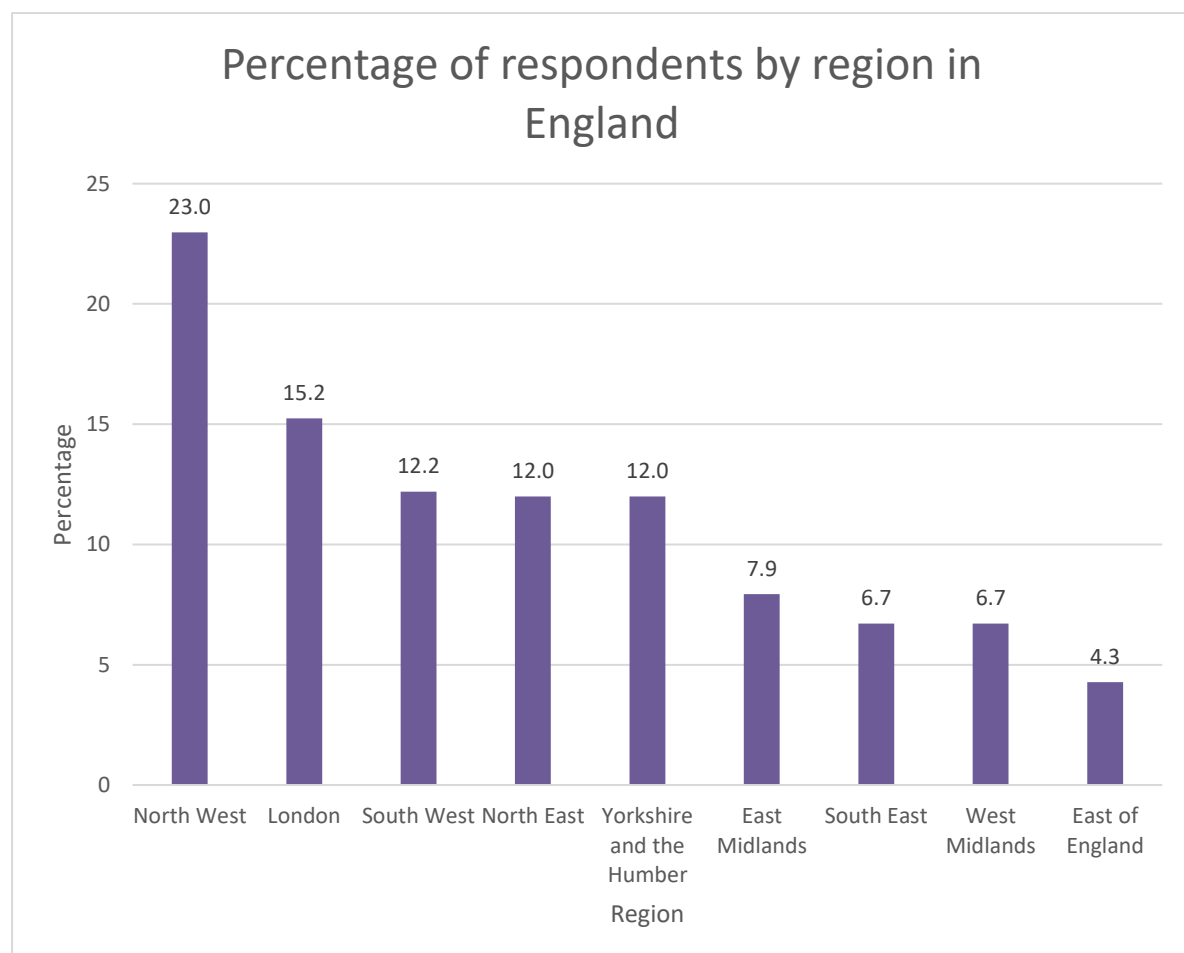

| UK Region       | Number of responses |       |
|-----------------|---------------------|-------|
|                 | n                   | %     |
| East Midlands   | 39                  | 7.93  |
| East of England | 21                  | 4.27  |
| London          | 75                  | 15.24 |
| North East      | 59                  | 11.99 |

|                          |     |       |
|--------------------------|-----|-------|
| North West               | 113 | 22.97 |
| South East               | 33  | 6.71  |
| South West               | 60  | 12.2  |
| West Midlands            | 33  | 6.71  |
| Yorkshire and the Humber | 59  | 11.99 |

**Supplementary Table S2 UK quota sample size and responses to the survey**

|                                                                | Target sample size | Actual number of responses | % of target sample size |
|----------------------------------------------------------------|--------------------|----------------------------|-------------------------|
| Nursing Professionals<br>(Nurses, nurse assistants & midwives) | 548                | 962                        | 175                     |
| Pharmacists                                                    | 113                | 523                        | 462                     |
| Physicians                                                     | 365                | 427                        | 117                     |
| Other healthcare workers                                       | 219                | 360                        | 164                     |
| Dentists                                                       | 70                 | 22                         | 32                      |
| All healthcare workers                                         | 1315               | 2294                       | 174                     |

**Supplementary Table S3 Percentage of UK respondents by profession**

| Professional Group          | Number of responses |      |
|-----------------------------|---------------------|------|
|                             | n                   | %    |
| Nurse                       | 892                 | 37.1 |
| Pharmacist                  | 523                 | 21.8 |
| Medical doctor              | 427                 | 17.8 |
| Pharmacy Technician         | 153                 | 6.4  |
| Allied Health Professional  | 147                 | 6.1  |
| Scientist                   | 68                  | 2.8  |
| Other healthcare worker     | 59                  | 2.5  |
| Nursing associate/assistant | 47                  | 2.0  |
| Other                       | 37                  | 1.5  |
| Midwife                     | 23                  | 1.0  |
| Dentist                     | 22                  | 0.9  |
| Unknown                     | 5                   | 0.2  |
| Dental care professional    | 1                   | 0.0  |

**Supplementary Table S4 Respondents' age, gender and professional setting (n = 2,404)**

| <b>Gender identified with</b>       | <b>Number of respondents</b> |          |
|-------------------------------------|------------------------------|----------|
|                                     | <b>n</b>                     | <b>%</b> |
| Female                              | 1863                         | 77%      |
| Male                                | 510                          | 21%      |
| prefer not to say                   | 31                           | 1%       |
| <b>Age (years)</b>                  | <b>Number of respondents</b> |          |
|                                     | <b>n</b>                     | <b>%</b> |
| <18                                 | 1                            | 0%       |
| >66                                 | 21                           | 1%       |
| 18-25                               | 97                           | 4%       |
| 26-35                               | 463                          | 19%      |
| 36-45                               | 619                          | 26%      |
| 46-55                               | 809                          | 34%      |
| 56-65                               | 376                          | 16%      |
| prefer not to say                   | 18                           | 1%       |
| <b>Predominant practice setting</b> | <b>Number of respondents</b> |          |
|                                     | <b>n</b>                     | <b>%</b> |
| Hospital                            | 1,382                        | 57.49    |
| Community                           | 752                          | 31.28    |
| Governmental organisation           | 72                           | 3        |
| Pharmacy                            | 68                           | 2.83     |
| University                          | 41                           | 1.71     |
| Public Health institute             | 31                           | 1.29     |
| LTCF                                | 25                           | 1.04     |
| Other                               | 13                           | 0.54     |
| Professional body                   | 9                            | 0.37     |
| Not specified                       | 3                            | 0.12     |
| Industry                            | 1                            | 0.04     |
| Unknown                             | 7                            | 0.29     |

**Supplementary Table S5 – Percentage of UK and EU/EEA respondents that use the different social media platforms**

| <b>Social Media</b> | <b>Number of responses (n = 2,404)</b> |          |
|---------------------|----------------------------------------|----------|
|                     | <b>n</b>                               | <b>%</b> |
| None                | 1058                                   | 44       |
| Facebook            | 577                                    | 24       |
| Twitter             | 553                                    | 23       |
| LinkedIn            | 240                                    | 10       |
| Google +*           | 192                                    | 8        |

|           |     |   |
|-----------|-----|---|
| YouTube   | 144 | 6 |
| Instagram | 120 | 5 |

\* (likely confusion with google search engine)

**Supplementary Figure S2 – The percentage of respondents answering all seven knowledge test questions correctly - by profession (n=2,403)**

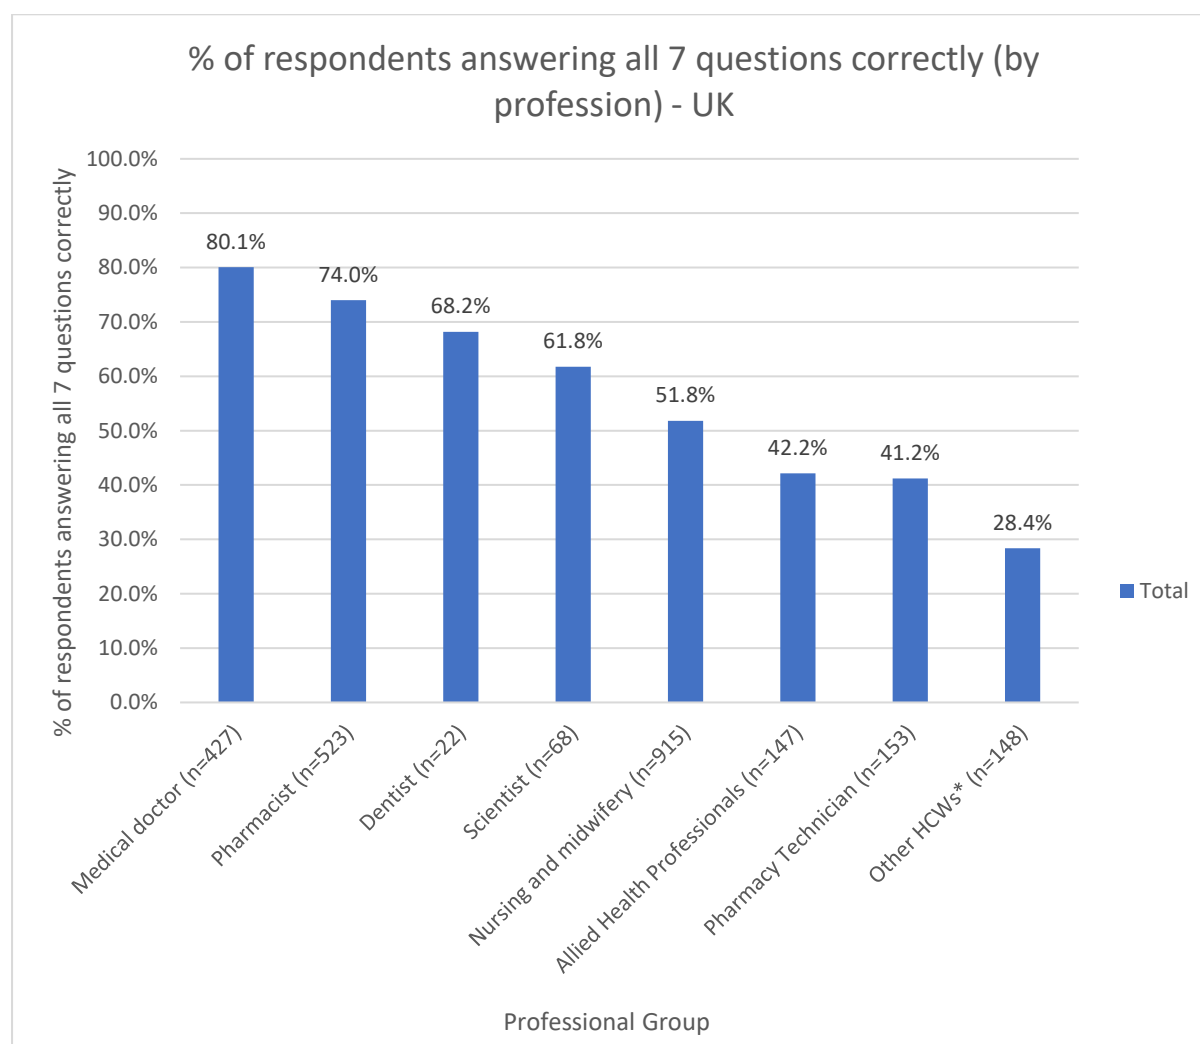

| Prof Group                                                                  | Number of respondents |       |
|-----------------------------------------------------------------------------|-----------------------|-------|
|                                                                             | n                     | %     |
| Medical doctor                                                              | 342                   | 80.1% |
| Pharmacist                                                                  | 387                   | 74.0% |
| Dentist                                                                     | 15                    | 68.2% |
| Scientist                                                                   | 42                    | 61.8% |
| Nursing and midwifery                                                       | 0                     | 51.8% |
| Allied Health Professionlas                                                 | 62                    | 42.2% |
| Pharmacy Technician                                                         | 63                    | 41.2% |
| *Other HCWs (Nursing associates, dental care professionals, unknown, other) | 42                    | 28.4% |

**Supplementary Figure S3a – Percentage of respondents answering question 5 correctly, by professional group**

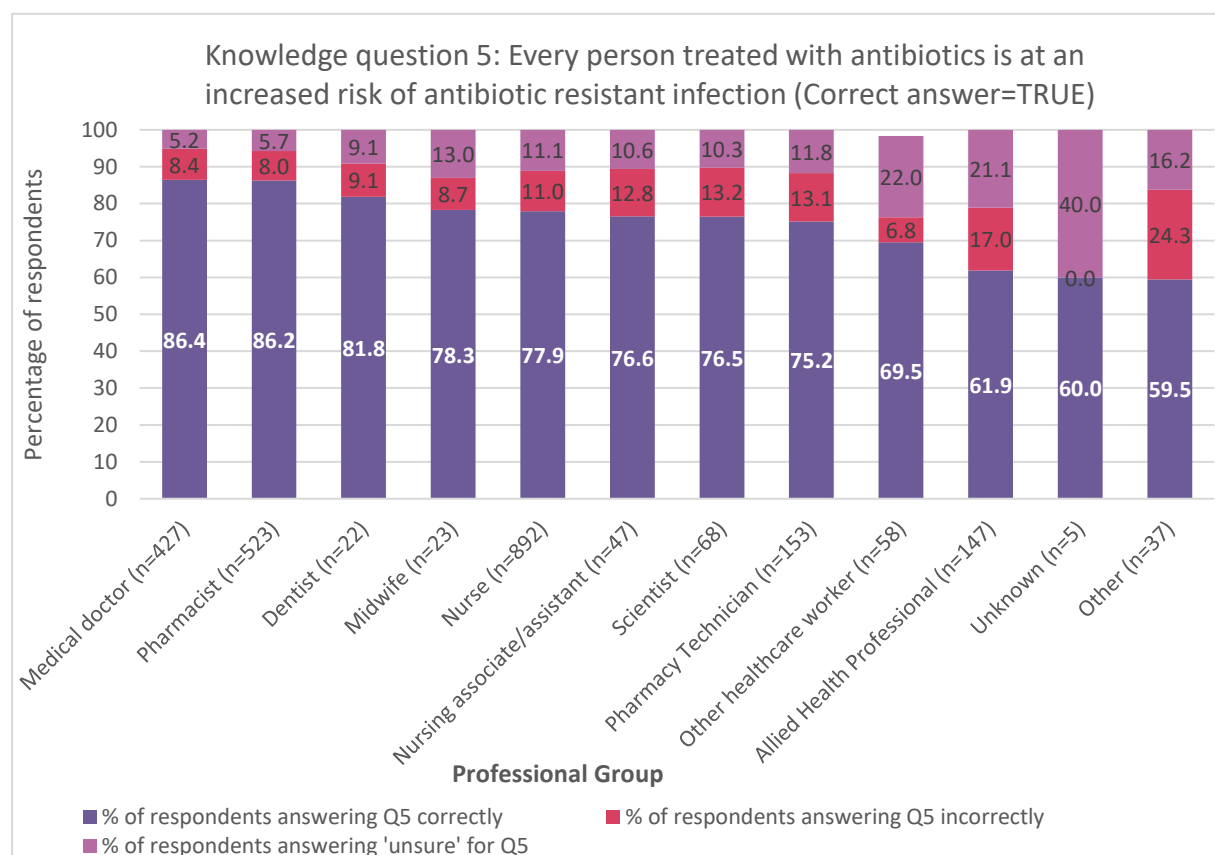

**Supplementary Figure S3b – Percentage of respondents answering question 6 correctly, by professional group**

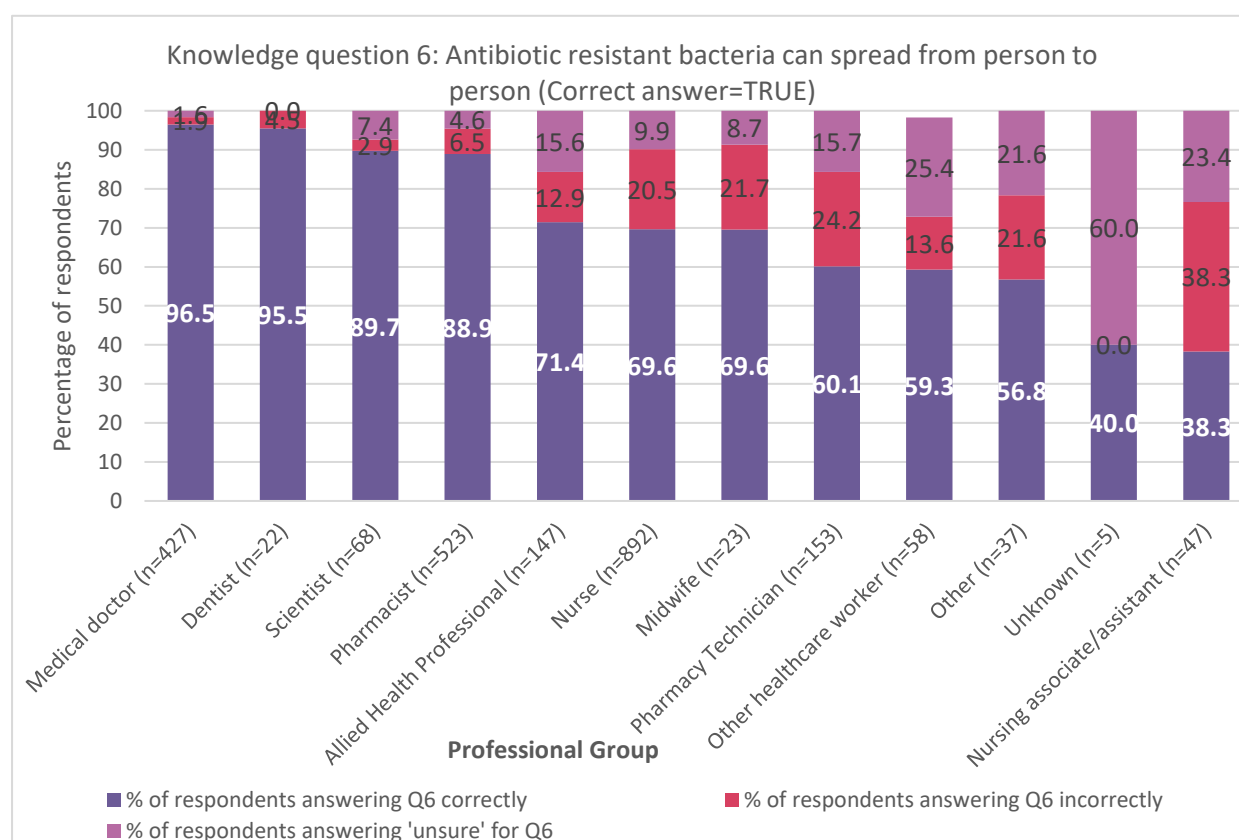

**Supplementary Table S6 – Respondents answering all seven knowledge test questions correctly, by UK constituent**

| UK Constituent          | Number of respondents answering all 7 questions correctly | % respondents answering all 7 questions correctly |
|-------------------------|-----------------------------------------------------------|---------------------------------------------------|
| Northern Ireland (n=51) | 41                                                        | 80.4%                                             |
| England (n=1,209)       | 755                                                       | 62.4%                                             |
| Scotland (n=949)        | 532                                                       | 56.1%                                             |
| Wales (n=175)           | 95                                                        | 54.3%                                             |
| Total UK (n=2,384)      | 1427                                                      | 59.4%                                             |
| EU/EEA (n=18,348)       | 10,642                                                    | 58.0%                                             |

### Supplementary Table S7 – Respondents answering the One Health knowledge question

correctly

Statement: The use of antibiotics to stimulate growth in farm animals is legal in the EU  
(Answer = false)

| Response | Frequency (n=2403) | Percentage (%) |
|----------|--------------------|----------------|
| True     | 753                | 31.3           |
| False    | 559                | 23.3           |
| Unsure   | 1091               | 45.4           |

### Supplementary Table S8 – Respondents answering the Hand Hygiene knowledge question

correctly

Statement: I can list the WHO's five moments of hand hygiene

| Response | Frequency (n=2411) | Percentage (%) |
|----------|--------------------|----------------|
| Yes      | 1116               | 46.3           |
| No       | 507                | 21.0           |
| Unsure   | 435                | 18.0           |
| Blank    | 353                | 14.6           |

### Supplementary Figure S4 - Percentage of respondents who agree with the following motivation statements.

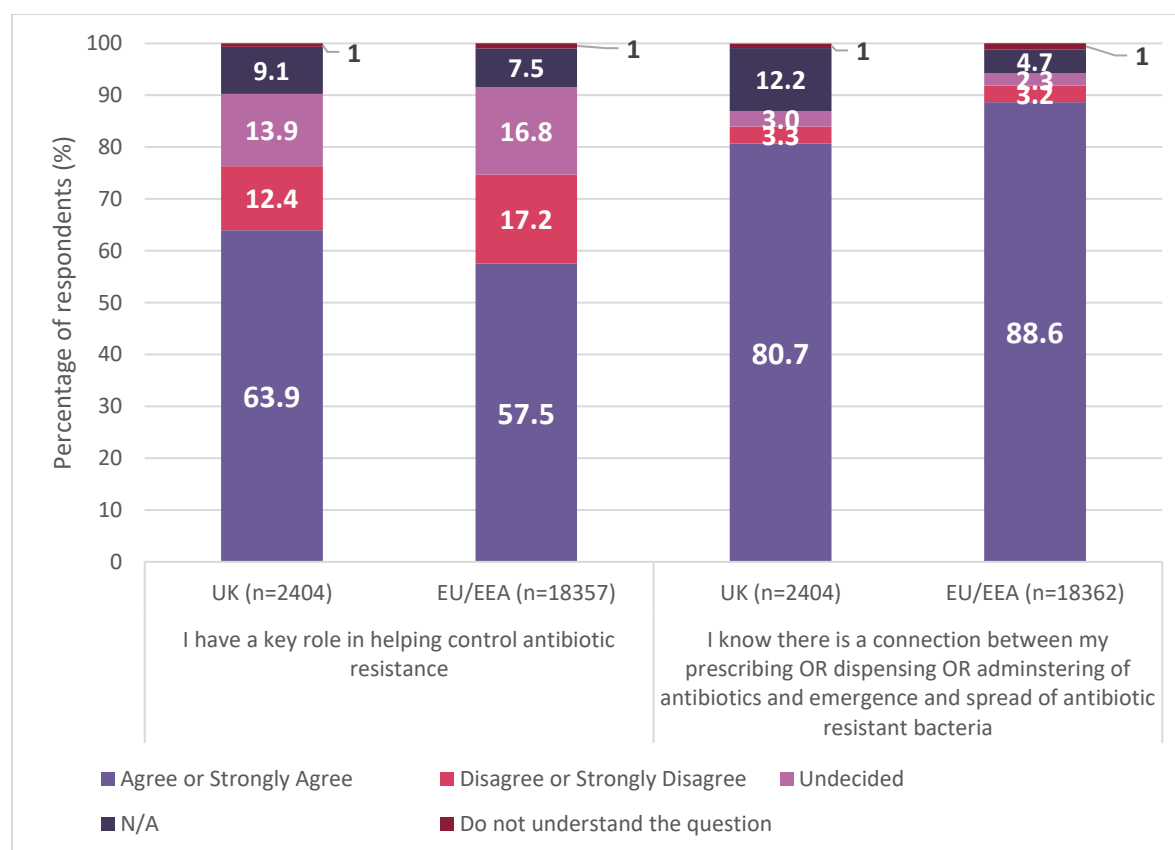

**Supplementary Figure S5 - Percentage of UK respondents agreeing to the motivation statements (by constituent).**

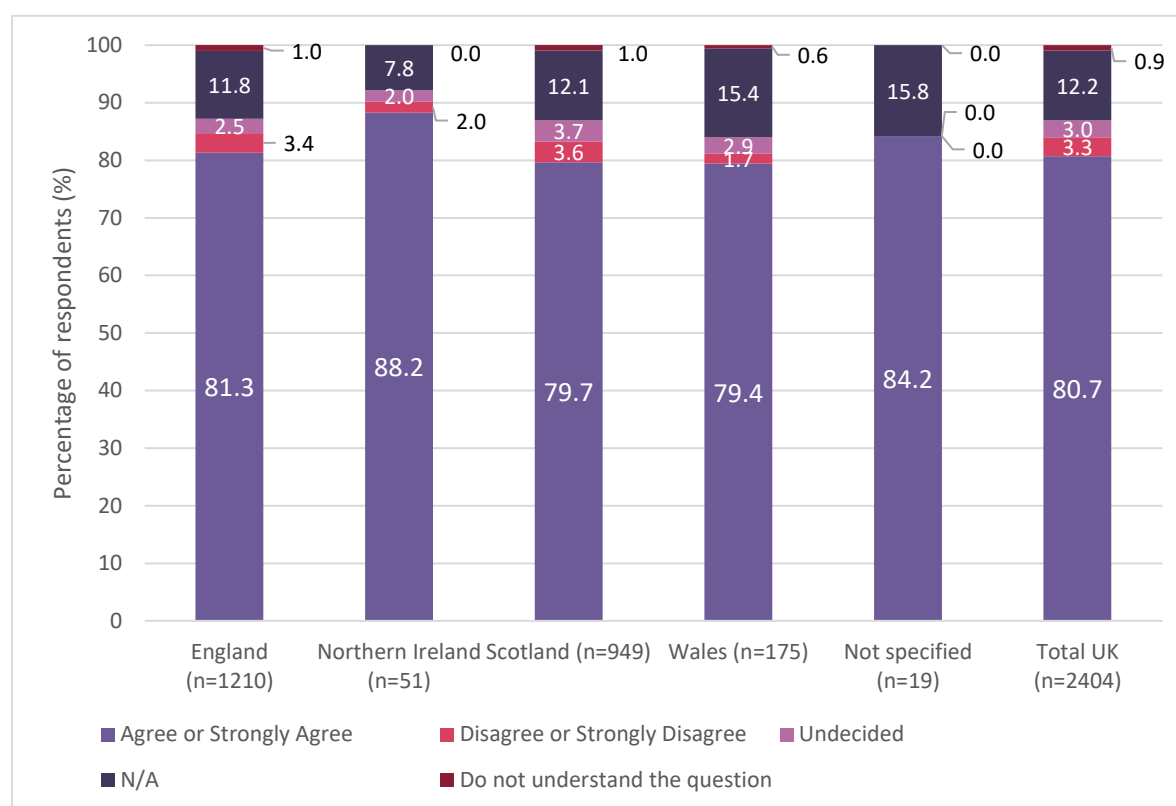

**Supplementary Table S9. The frequency of prescribing/administering/dispensing antibiotics during the last one week.**

|                  | At least<br>once a week<br>(%) | Rarely (%) | Never (%) | N/A (%) | Do not<br>remember<br>(%) |
|------------------|--------------------------------|------------|-----------|---------|---------------------------|
| UK (n=1775)      | 59.4                           | 6.1        | 13.9      | 20.1    | 0.6                       |
| EU/EEA (n=14294) | 65.1                           | 7.1        | 11.3      | 15.4    | 1.1                       |



**Supplementary Figure S6 – Percentage of respondents that gave out resources or advice**

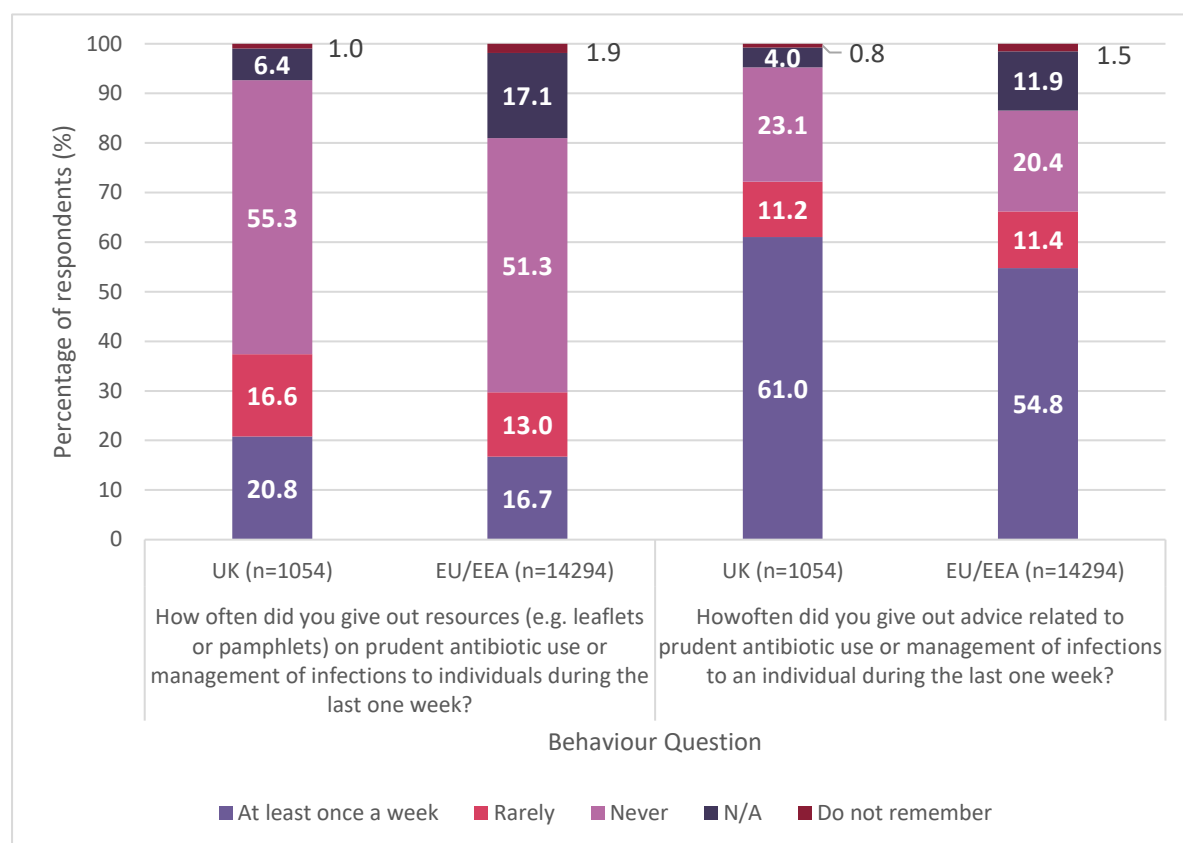

**Supplementary Table S10 – Barriers: Most common reasons why UK healthcare workers were unable to provide advice or resources to their patients in a one-week period**

| Why were you not able to provide advice or resources as often as you prescribed OR administered OR dispensed antibiotics? | Percentage of chosen option (% of total selection) in the UK (n=1671) |
|---------------------------------------------------------------------------------------------------------------------------|-----------------------------------------------------------------------|
| Not applicable                                                                                                            | 43.6                                                                  |
| No resources available                                                                                                    | 19.1                                                                  |
| Insufficient time                                                                                                         | 11.3                                                                  |
| Patient does not require information                                                                                      | 8.6                                                                   |
| I was able to give out advice or resources as needed                                                                      | 8.4                                                                   |
| Patient uninterested in information                                                                                       | 7.0                                                                   |
| I was not sure what advice to provide                                                                                     | 4.3                                                                   |
| Difficulty getting patient to understand diagnosis                                                                        | 4.1                                                                   |
| Language barriers                                                                                                         | 2.2                                                                   |

**Supplementary Figure S7 – Percentage of respondents who agree with the campaign impact and effectiveness statements in the UK and EU/EEA**

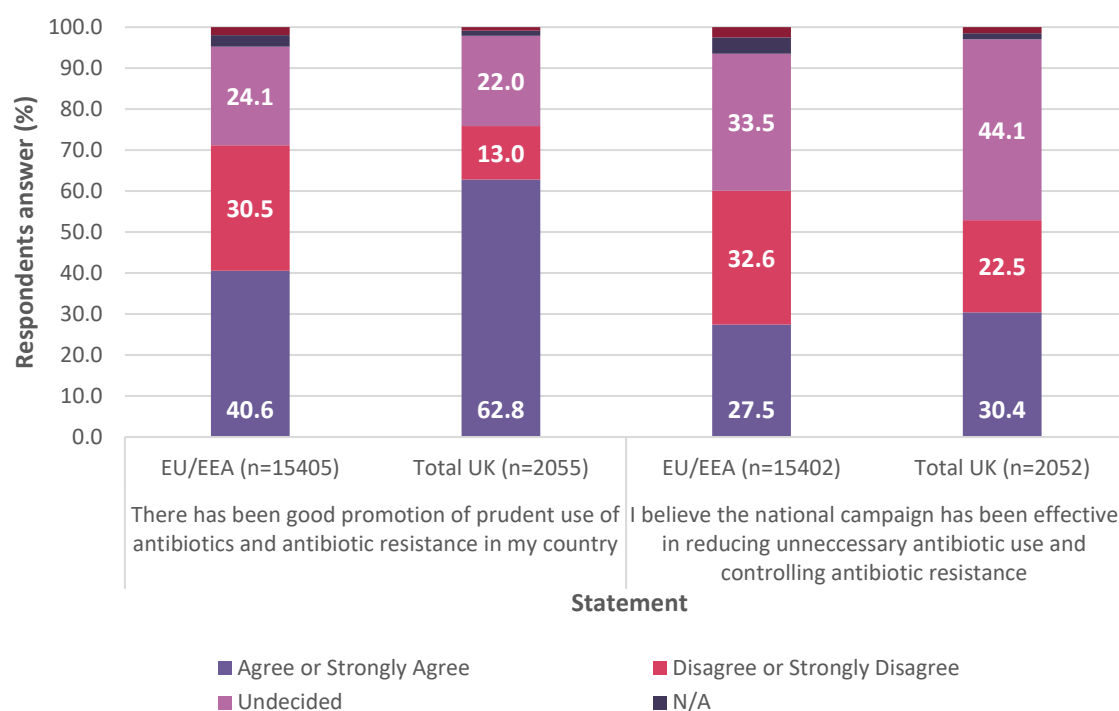

**Supplementary Figure S8 - Percentage of respondents who agree with the campaign impact and effectiveness statements across the devolved administrations**

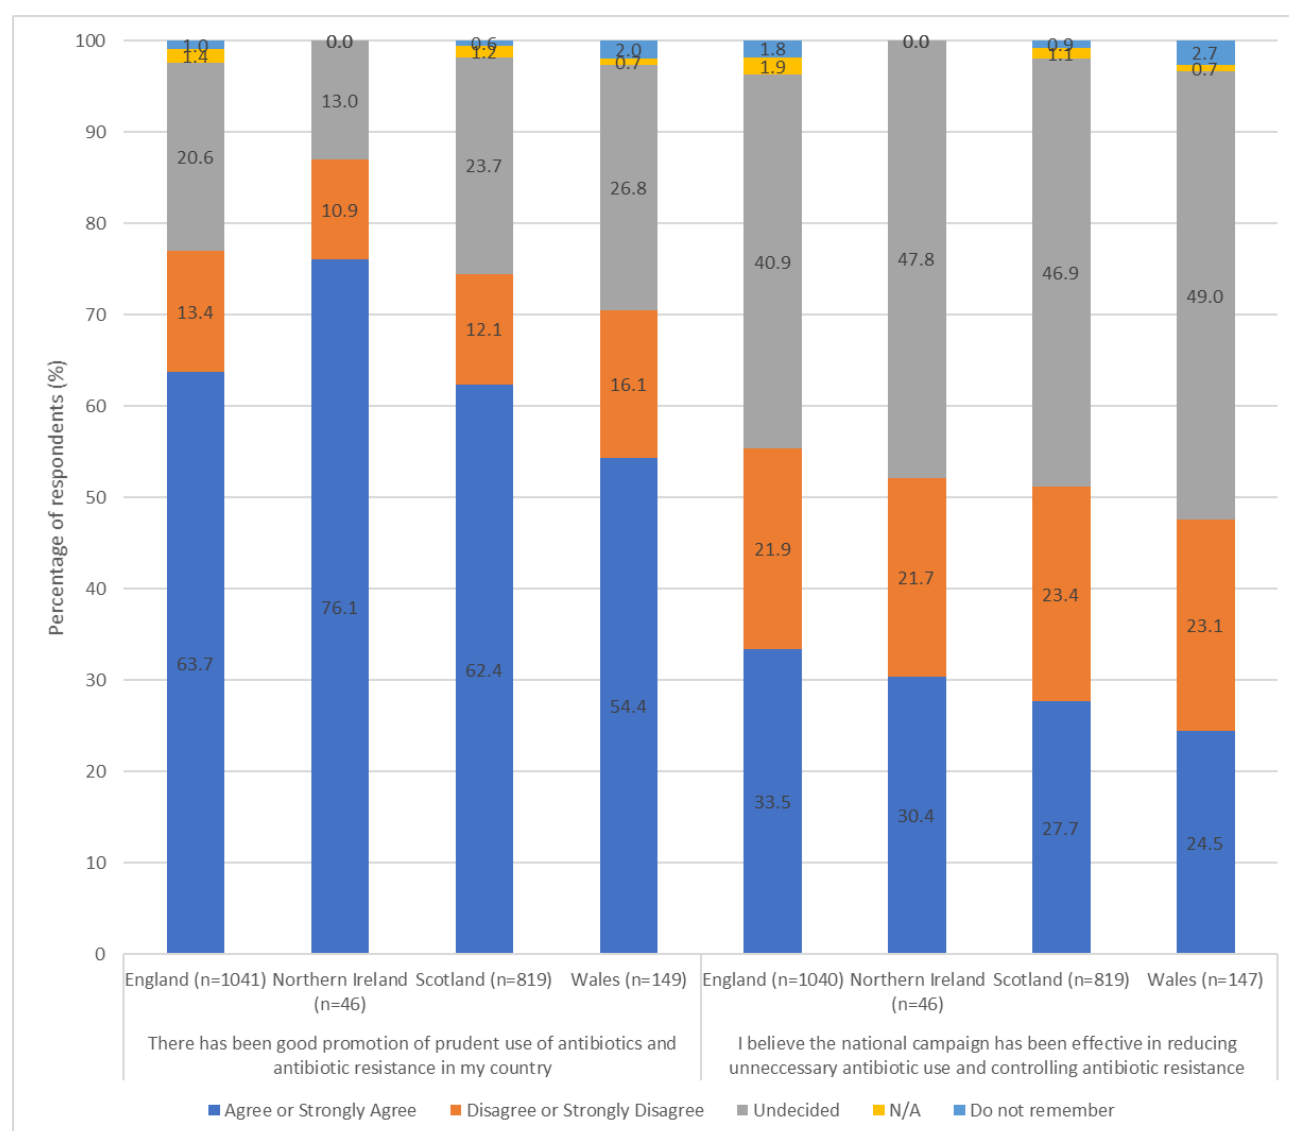

## Supplementary Figure S9 – Awareness of campaigns in a. the UK b. the EU/EEA

### a. Awareness of NAP (n=2,060), EAAD (n=2070) and WAAW (n=2,054)

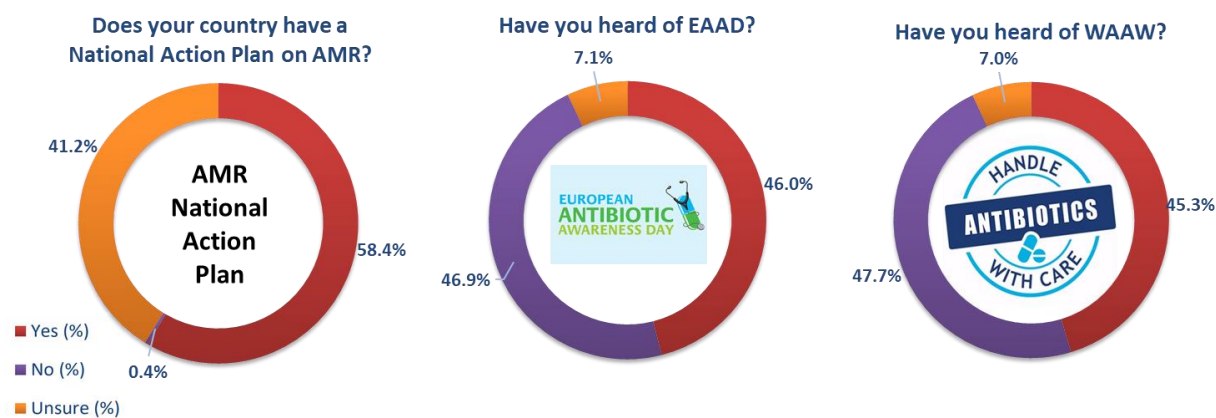

### a. b. Awareness of NAP (n=15,385), EAAD (n=15,518) and WAAW (n=15,397)

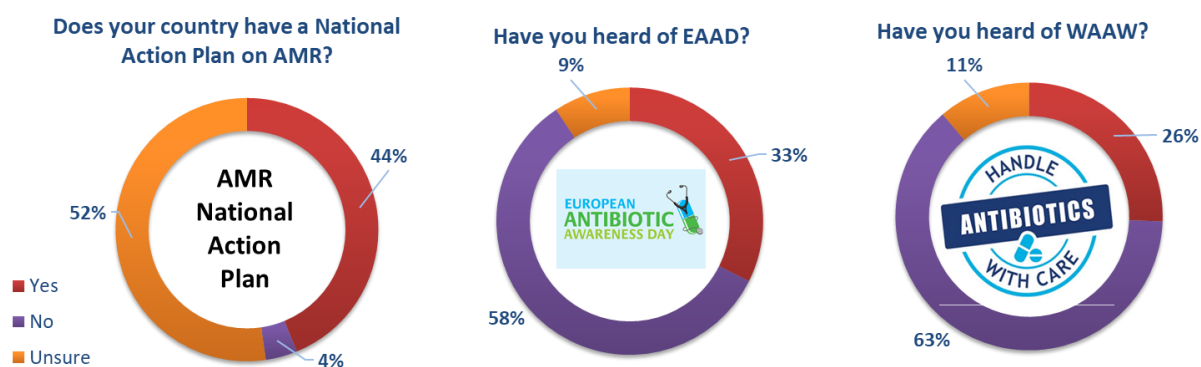

**Supplementary Figure S10 - Perceived effectiveness of EAAD and WAAW in the UK**

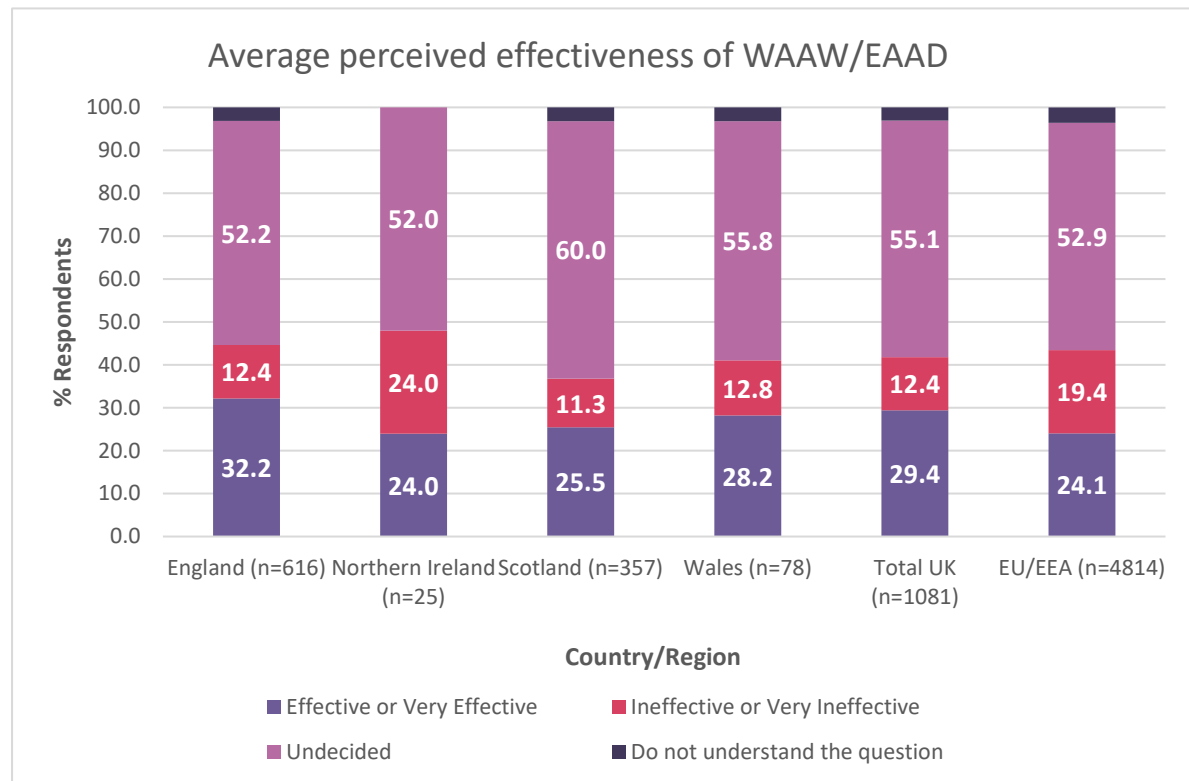

**Supplementary Figure S11 – Awareness of campaigns, projects and platforms related to antibiotic use and AMR in the UK.**

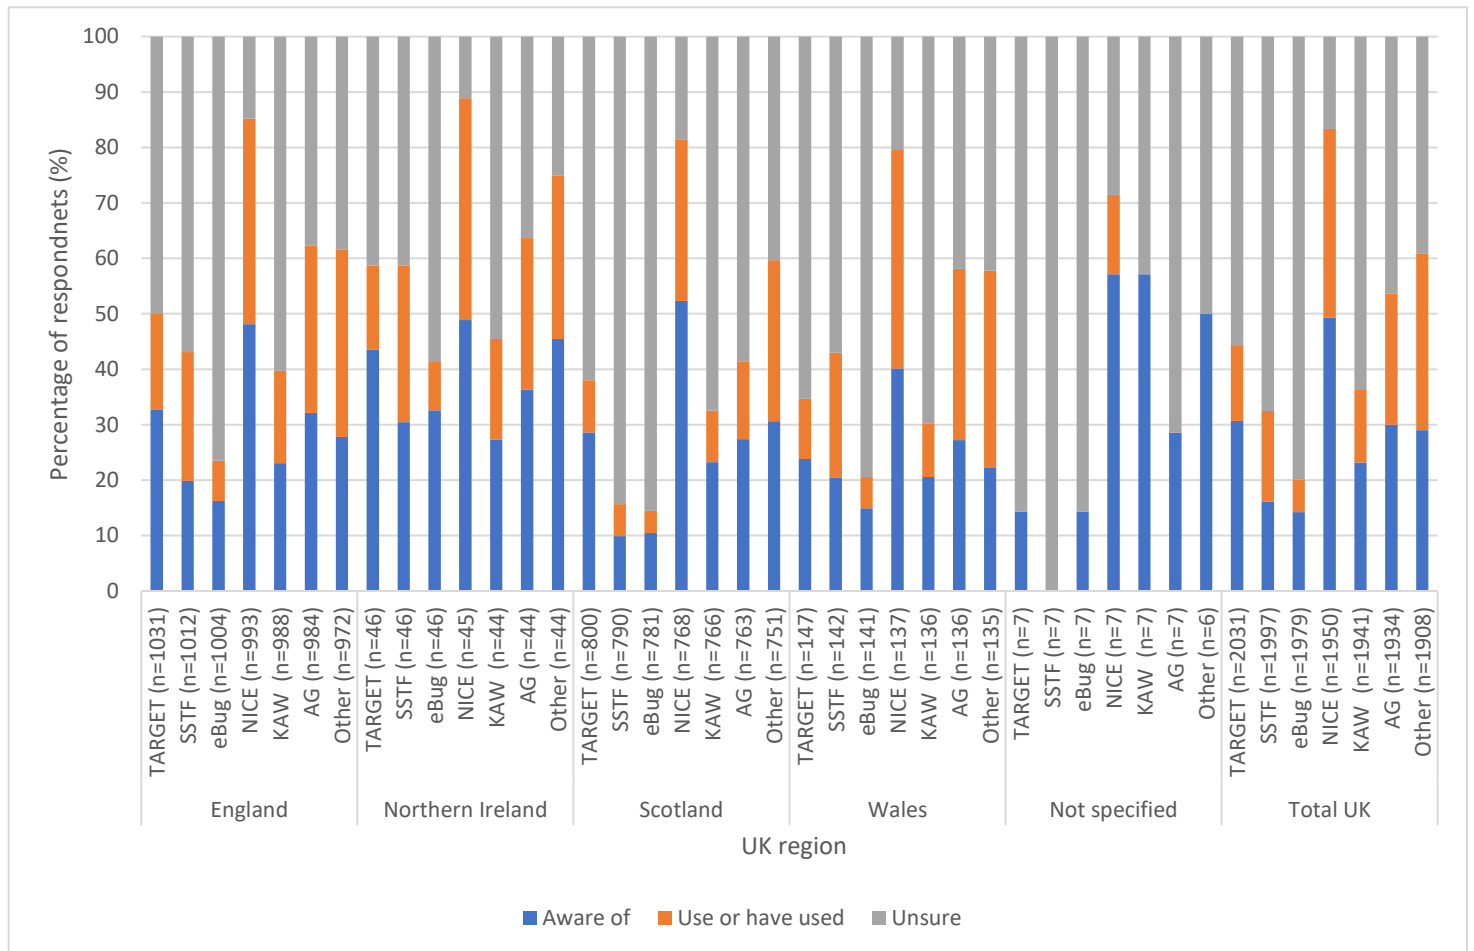

**Supplementary Figure S12 – Engagement with Antibiotic Guardian**

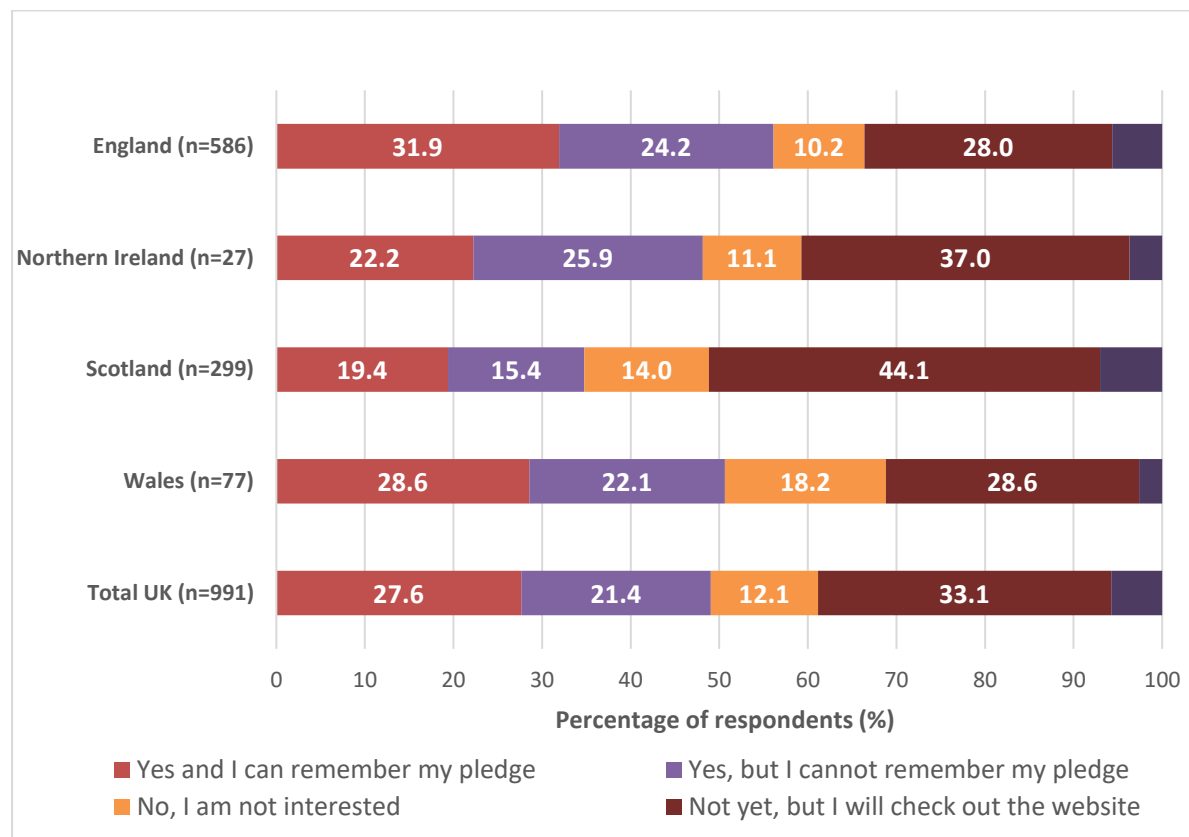

**Supplementary Figure S13 – Awareness of the Keep Antibiotics Working Campaign**

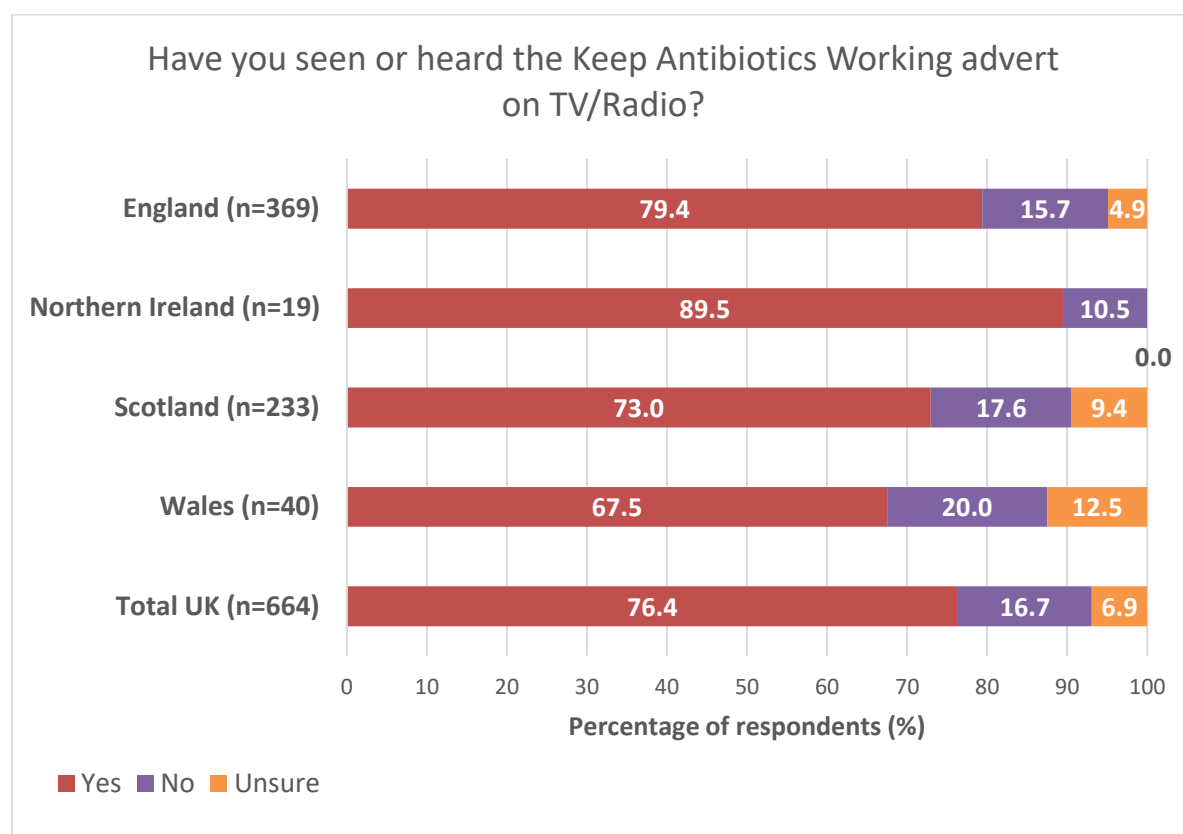

**Supplementary Table S11 – Professions of prescribers in the UK**

| Profession                  | Number of respondents that stated they were prescribers (%) |
|-----------------------------|-------------------------------------------------------------|
|                             | (n=699)                                                     |
| Medical doctor              | 318 (45.5)                                                  |
| Nurse                       | 199 (28.5)                                                  |
| Pharmacist                  | 131 (18.7)                                                  |
| Allied Health Professional  | 22 (3.1)                                                    |
| Dentist                     | 17 (2.4)                                                    |
| Midwife                     | 6 (0.9)                                                     |
| Other healthcare worker     | 2 (0.3)                                                     |
| Nursing associate/assistant | 1 (0.1)                                                     |
| Other                       | 1 (0.1)                                                     |
| Scientist                   | 1 (0.1)                                                     |
| Unknown                     | 1 (0.1)                                                     |



**Supplementary Table S12 – Setting of prescribers in the UK**

| Setting                   | Number of respondents that stated they were prescribers (%) |
|---------------------------|-------------------------------------------------------------|
|                           | (n=699)                                                     |
| Hospital                  | 421 (60.2)                                                  |
| Community                 | 246 (35.2)                                                  |
| Pharmacy                  | 10 (1.4)                                                    |
| Governmental organisation | 5 (0.7)                                                     |
| Long term care facility   | 5 (0.7)                                                     |
| Public health institute   | 3 (0.4)                                                     |
| University                | 3 (0.4)                                                     |
| Other                     | 2 (0.3)                                                     |
| Unknown                   | 2 (0.3)                                                     |
| Industry                  | 1 (0.1)                                                     |
| Professional body         | 1 (0.1)                                                     |

**Supplementary Figure S14 – Responses from UK prescribers to the motivation statements**

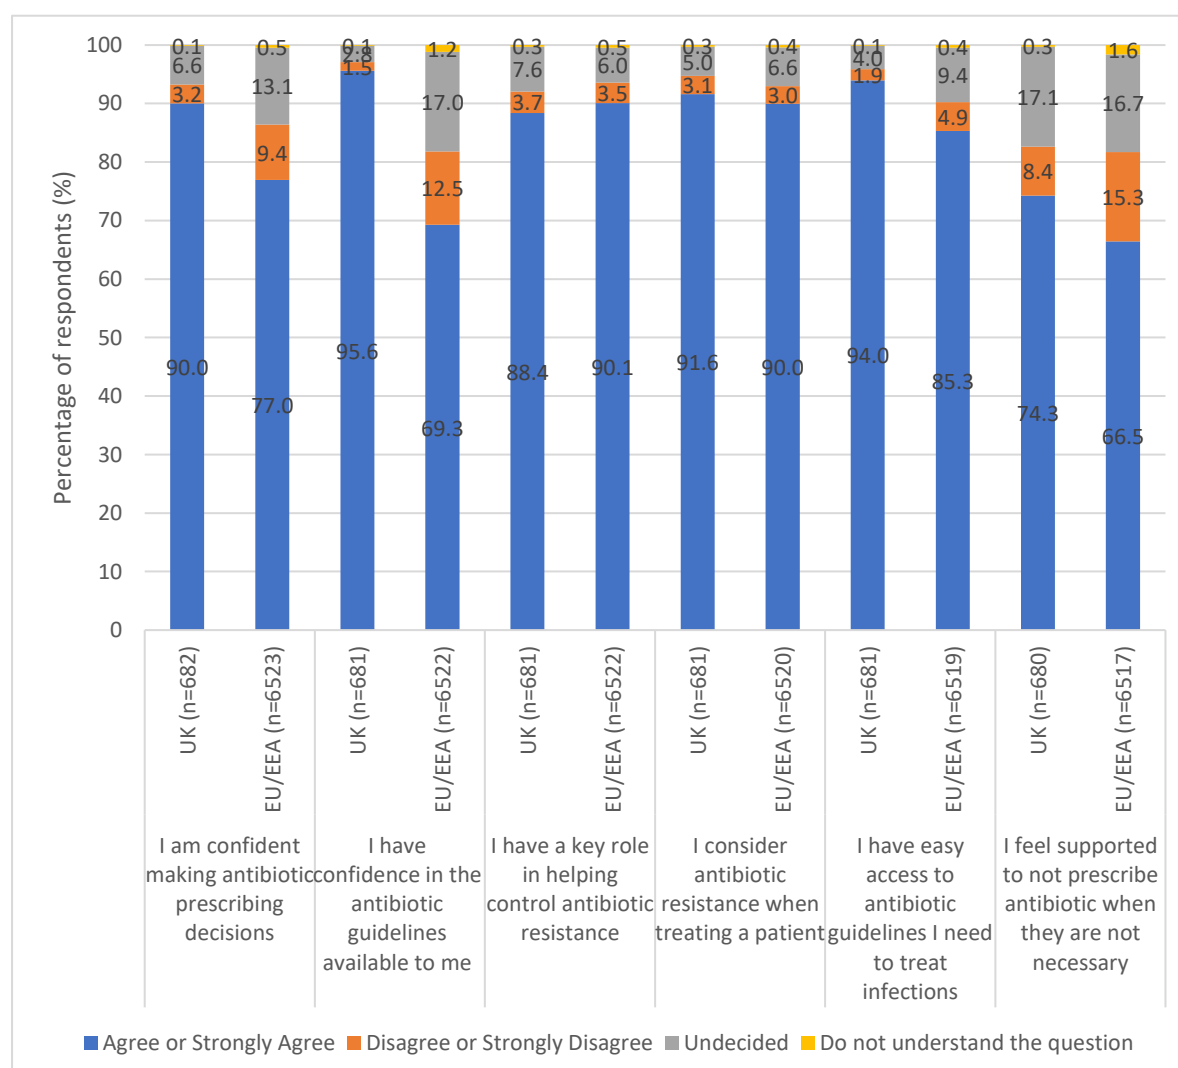

Supplement: s1 [file s1]
