# Supplementary material
Source: MDPI journal article supplement (https://www.mdpi.com/2079-6382/11/8/1133)
Supplement: s1 [file s1]

Archive with 3 entries (3 files):
- antibiotics-1820274-revised supplementary.pdf
- Supplementary Material - UK Only ECDC Survey - English Final.pdf
- Supplementary Material -UK- Launch of ECDC Survey - Comms document -.pdf
